# Supplementary material
Source: Springer Nature journal article supplement (https://www.springermedizin.de/resource/supplementary/13075_2012_3589_MOESM5_ESM.pdf/9694872)

A

citrulline

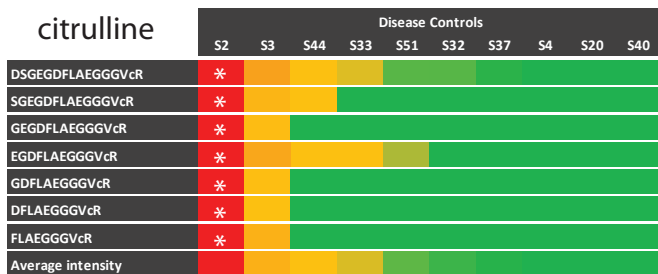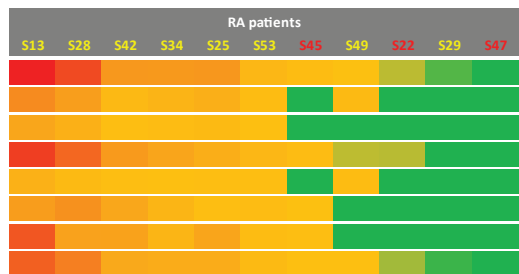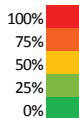

B

arginine

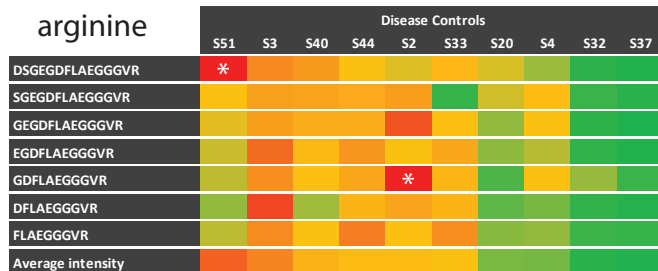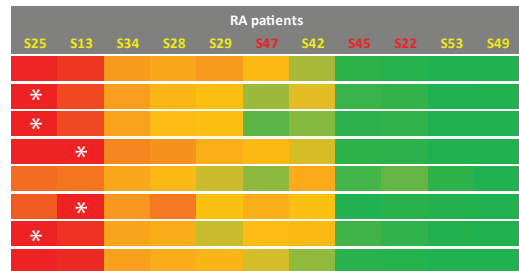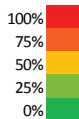

Supplement: MOESM5 [file 9694872]
